# Supplementary material for: Polymorphism of amyloid-like fibrils can be defined by the concentration of seeds
Source: PeerJ. 2015 Aug 20;3:e1207. doi: 10.7717/peerj.1207 (PMC4563235; doi:10.7717/peerj.1207)
Supplement: Supplemental Information 2 — Raw data and processing [file peerj-03-1207-s002.xlsx]

## Sheet: rPrP-A4M
	Raw data								Processing
	[GuSCN]	ThT intensity						plateau avg. intensity	35196.4	34993.1	24451.7	24759.3	24465.6	24905.8
		1 repeat	2 repeat	3 repeat	4 repeat	5 repeat	6 repeat		1 repeat	2 repeat	3 repeat	4 repeat	5 repeat	6 repeat	avg	stdev	error		+2sd	-2sd
	0.5	30164	29646	23681	23598	25790	26635		0.809958	0.793613	0.952153	0.927095	1.0801	1.10339	0.944385	0.13028	0.13672		1.20494	0.683826
	0.6	32628	33059	23840	23663	23538			0.903008	0.925348	0.962024	0.931175	0.943899		0.933091	0.0219238	0.027222		0.976938	0.889243
	0.7	35710	35540	22914	24189	24621	25073		1.0194	1.02111	0.904536	0.964196	1.0094	1.01	0.988106	0.0459488	0.0482203		1.08	0.896208
	0.8	33506	34683	24941	24985	23930	24083		0.936164	0.988031	1.03038	1.01417	0.967607	0.950805	0.981192	0.0365751	0.0383832		1.05434	0.908042
	0.9	35205	35794	24431	25272	25494	25090		1.00032	1.03091	0.998715	1.03218	1.0622	1.01101	1.02256	0.0242064	0.0254031		1.07097	0.974145
	1	35814	35443	24863	23970	23441	24569		1.02332	1.01737	1.02553	0.950448	0.938033	0.979864	0.989094	0.0386904	0.0406031		1.06648	0.911714
	1.1	36760	36759	25943	24866	23699	24582		1.05905	1.06816	1.09258	1.0067	0.953637	0.980641	1.02679	0.0547096	0.0574142		1.13621	0.917375
	1.2	35586	35855	24357	26742	27910	26452		1.01471	1.03327	0.994121	1.12447	1.20831	1.09245	1.07789	0.0804882	0.0844672		1.23887	0.916912
	1.3	41170	37763	24935		22977	24033		1.22559	1.10691	1.03		0.909971	0.947815	1.04406	0.126829	0.157479		1.29772	0.790399
	1.4	35421	35389	24612	25549	23256	23635		1.00848	1.01528	1.00995	1.04957	0.926844	0.924018	0.989025	0.0515058	0.0540521		1.09204	0.886013
	1.5	35102	36848	23642	23260	22803	26826		0.996435	1.0716	0.949732	0.905876	0.899447	1.11481	0.98965	0.0885155	0.0928913		1.16668	0.812619
	1.6	38201	38181	23539	24053	24026	24397		1.11347	1.12305	0.943338	0.955658	0.973413	0.969579	1.01308	0.0822153	0.0862797		1.17751	0.848653
	1.7	36484	37249	21511	21506	23536	23759		1.04862	1.08707	0.817435	0.795765	0.943779	0.931432	0.937351	0.11773	0.12355		1.17281	0.701892
	1.8	38711	37222	26147	26352	24430	25729		1.13272	1.08603	1.10525	1.09998	0.997847	1.04922	1.07851	0.0480336	0.0504082		1.17458	0.982442
	1.9	34416	35967	23439	23242	23522	24189		0.970529	1.03759	0.937129	0.904746	0.942932	0.957143	0.958345	0.0446996	0.0469094		1.04774	0.868946
	2	35813	36127	22793	23228	23723	24083		1.02329	1.04377	0.897024	0.903867	0.955088	0.950805	0.962306	0.0603579	0.0633418		1.08302	0.84159
	2.1	33545	35242	23230	23470	24098	23766		0.937637	1.00961	0.924154	0.919059	0.977768	0.931851	0.950013	0.0358654	0.0376384		1.02174	0.878282
	2.2	34108	33159	27488	23650	22542	22109		0.958898	0.929207	1.1885	0.930359	0.883662	0.832776	0.9539	0.123151	0.129239		1.2002	0.707599
	2.3	36831	38433	23663	22938	23161	23826		1.06173	1.13277	0.951036	0.885662	0.921099	0.935438	0.981289	0.095082	0.0997825		1.17145	0.791125
	2.4	37305	38301	21722	21866	21348	23317		1.07963	1.12768	0.830534	0.818364	0.81145	0.905005	0.928777	0.14035	0.147289		1.20948	0.648076
	2.5	33034	34404	22159	23581	22593	23405		0.91834	0.977262	0.857664	0.926027	0.886747	0.910266	0.912718	0.0402147	0.0422027		0.993147	0.832288
	2.6	33955	33943	21244	21255	23030	21719		0.95312	0.959468	0.800859	0.780008	0.913176	0.809458	0.869348	0.0816328	0.0856684		1.03261	0.706082
	2.7	34143	33274	18137	19074	21504	21779		0.96022	0.933646	0.60797	0.64309	0.820885	0.813045	0.796476	0.145299	0.152482		1.08707	0.505877
	2.8	30538	30104	21051	20315	19593	20378		0.824081	0.811291	0.788877	0.720997	0.705309	0.729277	0.763305	0.0509151	0.0534321		0.865136	0.661475
	2.9	28443	29463	18183	18880	18621	18533		0.744966	0.786549	0.610826	0.630912	0.646523	0.618962	0.673123	0.0739333	0.0775883		0.82099	0.525256
	3	22516	23373	17141	17143	17341	20293		0.52114	0.551488	0.546136	0.521867	0.56911	0.724195	0.572323	0.0766299	0.0804182		0.725583	0.419063
	3.1	17791	18153	15742	15639	15169	15197		0.342706	0.350006	0.459283	0.42745	0.437749	0.419497	0.406115	0.0482301	0.0506144		0.502576	0.309655
	3.2	16586	17510		13802	13037	17510		0.297201	0.325188		0.312129	0.308807	0.557795	0.360224	0.110895	0.137694		0.582014	0.138434
	3.3	14624	14912	12270	12364	11947	11788		0.223108	0.22491	0.243734	0.221855	0.242885	0.215668	0.228693	0.0117435	0.0123241		0.25218	0.205206
	3.4	11213	11447	11823	12003	9318	9136		0.0942962	0.0911684	0.215984	0.199192	0.0838847	0.0571009	0.123604	0.0665716	0.0698626		0.256748	-0.00953885
	3.5	11192	11378	9800	10703	10652	12172		0.0935031	0.0885051	0.0903916	0.117582	0.164564	0.238628	0.132196	0.0595696	0.0625144		0.251335	0.0130565
	3.6	9563	9776	8904	9528	8780	8554		0.0319859	0.0266712	0.034766	0.0438185	0.0513469	0.0223022	0.0351485	0.0108129	0.0113475		0.0567743	0.0135226
	3.7	8716	9085	9373	9555	8301	8946		0	0	0.0638825	0.0455135	0.0223773	0.0457405	0.0295856	0.0264331	0.0277398		0.0824517	-0.0232805
	3.8	10253	10776	9401	9082	8255	8181		0.0580429	0.0652692	0.0656208	0.0158199	0.0195953	0	0.0373913	0.0289161	0.0303456		0.0952235	-0.0204409
	3.9	8887	9563	8715	8830	8849	8656		0.00645761	0.0184498	0.0230325	0	0.0555199	0.028401	0.0219768	0.019513	0.0204777		0.0610029	-0.0170493
	4	9048	9289	8344	9661	7931	8205		0.0125376	0.00787399	0	0.0521679	0	0.001435	0.0123357	0.020148	0.0211441		0.0526318	-0.0279603

## Sheet: rPrP-A2M
	Raw data								Processing
	[GuSCN]	ThT intensity						plateau avg. intensity	28077.2	28187.2	25791.8	27364.6	46983.9	47820
		1 repeat	2 repeat	3 repeat	4 repeat	5 repeat	6 repeat		1 repeat	2 repeat	3 repeat	4 repeat	5 repeat	6 repeat	avg	stdev	confidence		+2sd	-2sd
	0.5	22107	23083	26707	28343	43917	46476		0.697637	0.749477	1.05364	1.05237	0.917857	0.964716	0.905949	0.151475	0.158963		1.2089	0.602999
	0.6	28667	28843	26529	30114	48442	49910		1.02987	1.03219	1.04321	1.14716	1.03905	1.05487	1.05772	0.0447101	0.0469204		1.14714	0.968304
	0.7	28048	27715	25876	27288	44815	47529		0.99852	0.976824	1.00493	0.9959	0.941908	0.99236	0.985075	0.0231381	0.024282		1.03135	0.938798
	0.8	30419	30325	26260	27608	46643	47843		1.1186	1.10493	1.02744	1.01303	0.990869	1.0006	1.04258	0.0551446	0.0578707		1.15287	0.932289
	0.9		29962	25555	29060	47976	48844			1.08711	0.986122	1.09075	1.02657	1.02688	1.04349	0.0446909	0.0554911		1.13287	0.954105
	1	28317	28361	26016	26391	49220	49814		1.01214	1.00853	1.01314	0.947887	1.05989	1.05235	1.01566	0.0399127	0.0418858		1.09548	0.935831
	1.1	28732	28290	25929	25737	47680	47113		1.03316	1.00505	1.00804	0.912882	1.01864	0.981439	0.993202	0.0428818	0.0450017		1.07897	0.907438
	1.2	29088	28353	23994	25078	49493	51414		1.05119	1.00814	0.894636	0.877608	1.0672	1.09435	0.998855	0.0918466	0.0963871		1.18255	0.815162
	1.3	28592	28320	26817	29376	47147	45696		1.02607	1.00652	1.06008	1.10766	1.00437	0.944239	1.02482	0.0554155	0.058155		1.13565	0.913993
	1.4	28725	28620	24235	24651	44506	43561		1.03281	1.02124	0.908761	0.854753	0.933632	0.888189	0.939897	0.0723621	0.0759394		1.08462	0.795173
	1.5	28210	28513	25098	24610	42451	42171		1.00672	1.01599	0.959338	0.852558	0.878591	0.851697	0.927483	0.0759938	0.0797506		1.07947	0.775496
	1.6	27702	27550	22771	22571	39218	39288		0.980997	0.968725	0.82296	0.743419	0.791999	0.77601	0.847352	0.102121	0.107169		1.05159	0.643111
	1.7	24271	23399	20672	20546	33315	37509		0.807233	0.764987	0.699944	0.635029	0.633894	0.729306	0.711732	0.0697803	0.07323		0.851293	0.572172
	1.8	22233	21576	17531	17570	29551	30295		0.704018	0.675511	0.515859	0.475737	0.533079	0.539918	0.57402	0.092824	0.0974128		0.759668	0.388372
	1.9	18208	18171	14162	14340	20543	21029		0.500172	0.508388	0.318412	0.302849	0.29181	0.296658	0.369715	0.104651	0.109824		0.579016	0.160414
	2	16045	16468	12792	12658	23676	23610		0.390626	0.424802	0.23812	0.212818	0.375724	0.364417	0.334418	0.0871716	0.091481		0.508761	0.160075
	2.1	11671	11674	12467	12245	15462	14716		0.169104	0.189504	0.219073	0.190712	0.155721	0.130923	0.17584	0.0308047	0.0323275		0.237449	0.11423
	2.2	16997		11210	10986	14747	13873		0.43884		0.145404	0.123323	0.136571	0.108792	0.190586	0.139467	0.173171		0.469519	-0.0883471
	2.3	12622	12418	10844	10500	12309	12320		0.217268	0.226021	0.123954	0.0973098	0.0712719	0.0680213	0.133974	0.0709035	0.0744086		0.275781	-0.00783263
	2.4	12288	12122	10197	9883	10230	10603		0.200352	0.211493	0.0860351	0.0642844	0.0155882	0.0229451	0.100116	0.0860635	0.0903181		0.272243	-0.0720106
	2.5	11399	10996	9480	9222	12925	12534		0.155329	0.156227	0.0440139	0.0289039	0.0877708	0.0736394	0.0909806	0.0543474	0.0570341		0.199675	-0.0177141
	2.6	10384	10059	9013	9292	10934	10779		0.103924	0.110237	0.0166444	0.0326507	0.0344441	0.0275656	0.0542443	0.0414418	0.0434906		0.137128	-0.0286394
	2.7	10005	9767	9153	9047	10970	10630		0.0847294	0.0959056	0.0248494	0.0195369	0.0354083	0.0236539	0.0473472	0.0338787	0.0355535		0.115105	-0.0204101
	2.8	9417	9501	9336	8914	12892	10148		0.05495	0.0828499	0.0355745	0.012418	0.0868869	0.011	0.0472799	0.0333508	0.0349995		0.113981	-0.0194217
	2.9	9284		9242	9196	10247	10321		0.0482142		0.0300654	0.0275122	0.0160435	0.0155417	0.0274754	0.013322	0.0165415		0.0541195	0.000831339
	3	9611		8948	9021	10165	10661		0.0647752		0.0128349	0.0181452	0.0138473	0.0244677	0.0268141	0.0217098	0.0269562		0.0702336	-0.0166054
	3.1	9209		9167	9143	10208	9873		0.0444158		0.0256699	0.0246754	0.014999	0.00378042	0.0227081	0.0150129	0.018641		0.052734	-0.00731781
	3.2	9476		9259	9337	11732	10164		0.0579381		0.0310617	0.0350594	0.0558176	0.01142	0.0382594	0.019222	0.0238672		0.0767033	-0.00018462
	3.3	9242		9189	9179	9915	10094		0.0460871		0.0269592	0.0266023	0.00715129	0.00958232	0.0232764	0.015752	0.0195587		0.0547804	-0.00822752
	3.4	8866		8799	9002	9648	9862		0.0270445		0.00410249	0.0171282	0	0.00349164	0.0103534	0.0113781	0.0141277		0.0331095	-0.0124028
	3.5	8856		8731	9239	10807	10773		0.0265381		0.000117214	0.0298138	0.0310425	0.027408	0.0229839	0.0129101	0.01603		0.0488041	-0.00283621
	3.6	9040	10571	8729	9108	10126	9945		0.0358568	0.135367	0	0.022802	0.0128027	0.00567063	0.0354166	0.0505965	0.0530977		0.136609	-0.0657764
	3.7	9255		8971	8682	10027	9729		0.0467455		0.0141829	0	0.0101511	0	0.0142159	0.0192281	0.0238749		0.0526721	-0.0242403
	3.8	8929	9952	8949	9472	9848	9904		0.0302352	0.104986	0.0128935	0.0422853	0.00535677	0.00459426	0.0333918	0.0380794	0.0399618		0.109551	-0.0427669
	3.9	9269	9824	8907	9002	9861	9861		0.0474545	0.0987033	0.0104321	0.0171282	0.00570496	0.00346539	0.0304814	0.0370576	0.0388896		0.104597	-0.0436338
	4	8332	7813	8937	8835	9951	10252		0	0	0.0121903	0.00818944	0.00811551	0.0137303	0.00703758	0.00588024	0.00617093		0.0187981	-0.0047229

## Sheet: 0,2% 300s
	Raw data								Processing
	[GuSCN]	ThT intensity						plateau avg. intensity	21758.4	21469.2	22740.7	23004.5	20759.8	21060.8
		1 repeat	2 repeat	3 repeat	4 repeat	5 repeat	6 repeat		1 repeat	2 repeat	3 repeat	4 repeat	5 repeat	6 repeat	avg	stdev	confidence		+2sd	-2sd
	0.5	21845	21825	23212	23125	19966	20426		1.00676	1.02846	1.03688	1.00915	0.939237	0.952555	0.995507	0.0403029	0.0422953		1.07611	0.914902
	0.6	21280	21430	22171	21819	20541	21110		0.962632	0.996864	0.955421	0.909995	0.983251	1.00368	0.96864	0.0343155	0.0360119		1.03727	0.900009
	0.7	22841	22458	23939	23606	22733	22126		1.08456	1.0791	1.09377	1.04567	1.15104	1.07961	1.08896	0.034513	0.0362192		1.15798	1.01993
	0.8	23387	22559	23405	22868	21264	21777		1.12721	1.08718	1.05198	0.989637	1.0386	1.05353	1.05802	0.046363	0.0486549		1.15075	0.965295
	0.9	22863	22474	23112	24542	21714	22258		1.08628	1.08038	1.02905	1.11673	1.07304	1.08948	1.07916	0.028699	0.0301177		1.13656	1.02176
	1	19960	20488	22811	22739	22288	22259		0.859526	0.921512	1.0055	0.979843	1.11698	1.08955	0.995486	0.0978893	0.102729		1.19126	0.799707
	1.1	20611	20831	22147	23241	18816	18768		0.910376	0.948949	0.953544	1.01796	0.851207	0.828637	0.918445	0.0703082	0.0737839		1.05906	0.777828
	1.2	22199	21167	22818	23472	20182	20732		1.03442	0.975826	1.00605	1.03549	0.955771	0.975426	0.997163	0.0333975	0.0350486		1.06396	0.930368
	1.3	22338	21782	19788	20211	20619	21378		1.04527	1.02502	0.768954	0.787913	0.989222	1.02371	0.940015	0.126592	0.13285		1.1932	0.686831
	1.4	20260	19678	24004	24422	19475	19774		0.882959	0.856718	1.09885	1.10762	0.901652	0.903825	0.958604	0.113333	0.118936		1.18527	0.731938
	1.5	20376	20721			20596	19428		0.89202	0.94015			0.987462	0.877965	0.924399	0.0497643	0.079186		1.02393	0.824871
	1.6	18411	18787	17412	18153	18441	18549		0.738533	0.785445	0.583034	0.631667	0.822502	0.812269	0.728908	0.0997326	0.104663		0.928374	0.529443
	1.7	17766	18026	15380	15514	16354	16329		0.688152	0.72457	0.424032	0.43131	0.662747	0.646347	0.596193	0.133198	0.139782		0.862589	0.329798
	1.8	17458	18288	20592	20643	15673	15691		0.664094	0.745528	0.831866	0.820711	0.610619	0.598664	0.711914	0.102692	0.107769		0.917298	0.506529
	1.9	15024	15470	14213	14938	13032	13050		0.473974	0.52011	0.332715	0.387579	0.408457	0.401277	0.420685	0.0664619	0.0697475		0.553609	0.287761
	2	14258	14246	12699	12884	11480	12082		0.414141	0.422199	0.214246	0.231636	0.289655	0.328929	0.316801	0.0885871	0.0929665		0.493975	0.139627
	2.1	12407	12064	12159	12672	10016	10114		0.269559	0.247656	0.171992	0.215541	0.17759	0.181841	0.210696	0.0406965	0.0427083		0.292089	0.129304
	2.2	11732	10857	12359	11985	9371	9463		0.216834	0.151105	0.187641	0.163383	0.128217	0.133186	0.163394	0.0338962	0.0355719		0.231187	0.095602
	2.3	10598	10342	11490	11650	9640	9143		0.128257	0.109909	0.119643	0.137949	0.148808	0.109269	0.125639	0.0157896	0.0165701		0.157219	0.0940602
	2.4	10259	10016		11847	8460	8244		0.101778	0.083832		0.152906	0.0584822	0.0420784	0.0878152	0.0430113	0.0534056		0.173838	0.00179256
	2.5	10324	10227	9961	9833	8848	8485		0.106855	0.10071	0	0	0.0881826	0.0600906	0.0593064	0.0486705	0.0510766		0.156647	-0.0380346
	2.6	10072	10095	10950	10995	7847	7829		0.0871712	0.0901513	0.0773884	0.0882208	0.0115587	0.0110615	0.0609253	0.0386848	0.0405972		0.138295	-0.0164442
	2.7	9675	10005	11193	11017	8015	8159		0.0561613	0.082952	0.0964029	0.0898911	0.0244186	0.0357255	0.0642586	0.0300222	0.0315063		0.124303	0.00421426
	2.8	10023	10135	10950	10718	7696	7681		0.0833437	0.093351	0.0773884	0.0671905	0	0	0.0535456	0.0423352	0.044428		0.138216	-0.0311247
	2.9	9221	9699	10758	10670	8268	8874		0.0206992	0.0584744	0.0623645	0.0635463	0.0437851	0.0891643	0.056339	0.0227952	0.0239221		0.101929	0.0107486
	3	9788	9739	10751	11039	8502	8514		0.0649878	0.0616741	0.0618168	0.0915613	0.0616972	0.062258	0.0673325	0.0119372	0.0125273		0.0912069	0.0434582
	3.1	9333	9212	10556	10490	8245	8490		0.0294476	0.0195181	0.0465582	0.0498804	0.0420245	0.0604643	0.0413155	0.0147241	0.015452		0.0707637	0.0118673
	3.2	9331	9362	10672	11638	8213	8149		0.0292914	0.031517	0.0556351	0.137038	0.039575	0.0349781	0.0546725	0.0414276	0.0434756		0.137528	-0.0281827
	3.3	9427	9172	10375		8492	8358		0.03679	0.0163184	0.0323951		0.0609317	0.0505987	0.0394068	0.0171586	0.0213052		0.0737239	0.00508967
	3.4	9115	8968	10207	10613	8584	8654		0.0124195	0	0.0192493	0.0592188	0.0679741	0.0727216	0.0385972	0.0316293	0.033193		0.101856	-0.0246615
	3.5	9096	9318	10403	10623	10103	7981		0.0109354	0.0279973	0.0345861	0.059978	0.18425	0.0224219	0.0566947	0.064594	0.0677872		0.185883	-0.0724932
	3.6	9126	9250	10441	10157	8393	8797		0.0132788	0.0225578	0.0375596	0.0245986	0.0533535	0.0834093	0.0391263	0.0257663	0.0270401		0.0906589	-0.0124064
	3.7	9334	8969	10055	10063	9047	9103		0.0295257	7.99923e-05	0.00735542	0.0174619	0.103416	0.10628	0.0440197	0.048155	0.0505356		0.14033	-0.0522903
	3.8	8956	10449	10232	10274	8778	8798		0	0.118469	0.0212055	0.0334814	0.0828243	0.0834841	0.0565773	0.0452305	0.0474665		0.147038	-0.0338837
	3.9	9204	9266	10094	10330	8908	8798		0.0193714	0.0238377	0.0104071	0.037733	0.0927755	0.0834841	0.0446015	0.0349763	0.0367054		0.114554	-0.0253512
	4	9292	9436	11100	10132	9319	9191		0.0262451	0.0374364	0.0891257	0.0227005	0.124236	0.112857	0.0687668	0.0454908	0.0477397		0.159748	-0.0222148

## Sheet: 1% 300s 
	Raw data								Processing
	[GuSCN]	ThT intensity						plateau avg. intensity	19556.4	19547.3	25125.2	25544.9	15034.7	14898.5
		1 repeat	2 repeat	3 repeat	4 repeat	5 repeat	6 repeat		1 repeat	2 repeat	3 repeat	4 repeat	5 repeat	6 repeat	avg	stdev	confidence		+2sd	-2sd
	0.5	20404	20494	25526	25823	16002	15778		1.07689	1.08641	1.02395	1.01621	1.14617	1.1342	1.08064	0.0539916	0.0566607		1.18862	0.972657
	0.6	19287	19553	24587	25422	15231	15177		0.975555	1.00052	0.967842	0.992836	1.02966	1.0425	1.00149	0.0295157	0.0309748		1.06052	0.942454
	0.7	20716	20515	26572	27327	15843	15677		1.1052	1.08833	1.08645	1.10388	1.12214	1.11879	1.10413	0.0148517	0.0155859		1.13384	1.07443
	0.8	19408	19757	27698	27880	15267	14970		0.986533	1.01914	1.15373	1.13612	1.0351	1.01091	1.05692	0.070169	0.0736379		1.19726	0.916584
	0.9	20078	20004	23322	23628	15459	14953		1.04732	1.04169	0.892258	0.888259	1.06412	1.00832	0.990326	0.0796112	0.0835468		1.14955	0.831103
	1		19444	25654	25694	15071	13863			0.990571	1.0316	1.00869	1.00549	0.841993	0.975667	0.0761556	0.0945597		1.12798	0.823356
	1.1	17923	18166	23244	23744	14386	14218		0.851807	0.873915	0.887597	0.895021	0.901975	0.896162	0.884413	0.018668	0.0195909		0.921749	0.847077
	1.2	19486	19092	25581	25723	13801	14445		0.993609	0.95844	1.02723	1.01038	0.813576	0.9308	0.955674	0.0779374	0.0817903		1.11155	0.799799
	1.3	18955	19120	24662	25241	14676	15419		0.945435	0.960996	0.972323	0.982285	0.945797	1.07942	0.981043	0.0503356	0.052824		1.08171	0.880372
	1.4	19751	19328	24406	24967	14611	14485		1.01765	0.979982	0.957027	0.966313	0.935975	0.936904	0.965642	0.0306309	0.0321451		1.0269	0.90438
	1.5	19148	18662	25991	26216	14755	13538		0.962944	0.91919	1.05173	1.03912	0.957735	0.792401	0.953854	0.0940391	0.098688		1.14193	0.765775
	1.6	20811		24059	23636	13783	13957		1.11382		0.936294	0.888726	0.810856	0.856336	0.921206	0.117012	0.14529		1.15523	0.687182
	1.7	17081	17469	25341	26262	13665	13324		0.775418	0.810293	1.01289	1.0418	0.793025	0.759747	0.86553	0.126812	0.133081		1.11915	0.611906
	1.8	16874	17208	25414	25399	13995	13933		0.756638	0.786469	1.01726	0.991495	0.842891	0.852674	0.87457	0.106943	0.112229		1.08846	0.660685
	1.9	16137	15954	24522	24834	13327	13010		0.689774	0.672004	0.963958	0.95856	0.74195	0.711833	0.78968	0.134952	0.141624		1.05958	0.519775
	2	15299	15432	22044	22572	13132	13525		0.613748	0.624355	0.815896	0.826703	0.712483	0.790417	0.7306	0.0952469	0.0999555		0.921094	0.540107
	2.1	13789	14410	18944	19179	13403	13287		0.476755	0.531067	0.630669	0.628917	0.753434	0.754101	0.629157	0.113054	0.118643		0.855265	0.403049
	2.2	12969	13138	19111	19229	12981	12653		0.402361	0.414959	0.640647	0.631831	0.689666	0.657359	0.572804	0.128731	0.135095		0.830267	0.315341
	2.3	12924	13373	15855	15845	12382	12579		0.398278	0.43641	0.446099	0.43457	0.599151	0.646067	0.493429	0.102455	0.10752		0.698339	0.28852
	2.4	11863	12204	13736	14575	11324	11376		0.30202	0.329703	0.319487	0.360538	0.439276	0.462501	0.368921	0.0666856	0.0699822		0.502292	0.23555
	2.5	10749	11221	13264	13515	12258	11760		0.200954	0.239975	0.291285	0.298748	0.580413	0.521096	0.355412	0.156578	0.164318		0.668567	0.0422566
	2.6	10302	10417	12787	13127	10860	10419		0.1604	0.166586	0.262784	0.276131	0.369161	0.316472	0.258589	0.0824714	0.0865484		0.423532	0.0936462
	2.7	11472	12306	11754	11936		12050		0.266547	0.339014	0.201061	0.206705		0.565347	0.315735	0.150254	0.186565		0.616243	0.0152267
	2.8	9940	9692	11061	11081	10032	9786		0.127558	0.100408	0.159654	0.156865	0.244042	0.219883	0.168068	0.0545383	0.0572344		0.277145	0.0589917
	2.9	9584	9844	10825	10755		9550		0.0952602	0.114283	0.145553	0.137861		0.183871	0.135366	0.0335996	0.0417195		0.202565	0.0681664
	3	8952	9098	10059	10958	9010	9086		0.0379226	0.0461877	0.0997837	0.149695	0.0896082	0.113069	0.0893777	0.0420019	0.0440783		0.173381	0.00537396
	3.1	9681	9576	9537	9569	9802	9731		0.10406	0.0898195	0.0685938	0.0687267	0.209287	0.21149	0.12533	0.0672439	0.0705681		0.259817	-0.00915809
	3.2	8680	8967	9320	9281	8662	8614		0.0132457	0.03423	0.0556279	0.0519385	0.0370219	0.0410468	0.0388518	0.0150858	0.0158315		0.0690233	0.0086803
	3.3	8534	8756	8897	9430	8526	9955		0	0.0149699	0.0303534	0.0606241	0.016471	0.24567	0.0613481	0.0925898	0.097167		0.246528	-0.123831
	3.4	8997	9136	8389	8390	8753	8537		0.0420052	0.0496563	0	0	0.0507729	0.0292973	0.028622	0.0234568	0.0246164		0.0755356	-0.0182917
	3.5	8701	9017	8902	9128	8417	8345		0.0151509	0.038794	0.0306521	0.0430198	0	0	0.0212695	0.0190286	0.0199693		0.0593267	-0.0167877
	3.6	8638	8592	8938	9067	8939	8734		0.00943529	0	0.0328031	0.0394639	0.0788794	0.0593576	0.0366566	0.0296834	0.0311509		0.0960234	-0.0227103
	3.7		8615	8913	8656	8671	8521			0.00209944	0.0313094	0.0155058	0.0383819	0.0268559	0.0228305	0.0142598	0.0177059		0.0513501	-0.00568917
	3.8	8892	8830	8789	8868	8790	8620		0.0324792	0.0217246	0.0239003	0.0278638	0.056364	0.0419623	0.034049	0.0130858	0.0137327		0.0602206	0.00787749
	3.9	9251	9013	8855	8936	8995	8658		0.0650491	0.0384289	0.0278438	0.0318276	0.0873415	0.0477607	0.0497086	0.0227174	0.0238404		0.0951433	0.00427392
	4	9342		8845		8946	8874		0.073305		0.0272463		0.0799371	0.0807202	0.0653022	0.0255877	0.0407157		0.116478	0.0141268

## Sheet: 5%_300s
	Raw data								Processing
	[GuSCN]	ThT intensity						plateau avg. intensity	26937.2	26894.6	33173.7	33680	28771.2	28837.4
		1 repeat	2 repeat	3 repeat	4 repeat	5 repeat	6 repeat		1 repeat	2 repeat	3 repeat	4 repeat	5 repeat	6 repeat	avg	stdev	confidence		+2sd	-2sd
	0.5	26402	26255	33050	33222	25417	25628		0.971768	0.966099	0.994951	0.98146	0.835677	0.841911	0.931978	0.0728665	0.0764687		1.07771	0.786245
	0.6	26805		32835	33880	29459	29476		0.993026		0.986174	1.0081	1.0337	1.03145	1.01049	0.0216791	0.0269182		1.05385	0.967131
	0.7	26489	26284	33189	33359	27648	28411		0.976357	0.967636	1.00062	0.987006	0.944974	0.978994	0.975932	0.0188102	0.0197401		1.01355	0.938312
	0.8	27367	27571	33227	34411	28940	29176		1.02267	1.03586	1.00218	1.02959	1.00827	1.01668	1.01921	0.0127523	0.0133827		1.04471	0.993702
	0.9	28368	28719	33626	33630	29301	29728		1.07548	1.09671	1.01846	0.997976	1.02596	1.04387	1.04307	0.0370395	0.0388706		1.11715	0.968995
	1	26255	26408	32731	32838	32984	31534		0.964014	0.974209	0.981929	0.965916	1.20639	1.13283	1.03755	0.105098	0.110294		1.24774	0.827351
	1.1	26693	26222	32971	33890	27297	27496		0.987118	0.96435	0.991726	1.0085	0.927778	0.933924	0.9689	0.0327297	0.0343477		1.03436	0.90344
	1.2	26817	26373	33086	34384	28051	28215		0.993659	0.972354	0.99642	1.0285	0.964717	0.96934	0.987498	0.0239856	0.0251713		1.03547	0.939527
	1.3	27723	27618	33365	32614	30051			1.04145	1.03835	1.00781	0.956849	1.0627		1.02143	0.041068	0.0509926		1.10357	0.939295
	1.4	26453	26601	33657	34572	28564	29873		0.974458	0.98444	1.01973	1.03611	0.989849	1.05101	1.00927	0.0309107	0.0324387		1.07109	0.947444
	1.5	26711	28694	32620	33935	28184	28466		0.988068	1.09538	0.977398	1.01032	0.971233	0.981704	1.00402	0.0467398	0.0490504		1.0975	0.910538
	1.6	25709	26196	33755	33281	26900	27087		0.935212	0.962972	1.02373	0.983849	0.908329	0.913777	0.954645	0.0444696	0.046668		1.04358	0.865706
	1.7	26989	26944	33509	33703	29082	28273		1.00273	1.00262	1.01369	1.00093	1.01523	0.972197	1.00123	0.0154808	0.0162461		1.03219	0.970271
	1.8	26399	27047	33545	34476	27054	27590		0.97161	1.00808	1.01516	1.03222	0.915874	0.938554	0.980249	0.0461553	0.048437		1.07256	0.887939
	1.9	25835	25491	32569	32866	28862	28487		0.941859	0.925602	0.975316	0.96705	1.00445	0.982738	0.966169	0.0284989	0.0299078		1.02317	0.909171
	2	27101	27489	32846	34672	32034	32031		1.00864	1.03151	0.986623	1.04016	1.15985	1.15731	1.06401	0.0755891	0.0793259		1.21519	0.912835
	2.1	25257	25359	30676	31897	30732	30000		0.911369	0.918605	0.898043	0.927825	1.09606	1.05726	0.968195	0.085466	0.0896911		1.13913	0.797263
	2.2	25659	25504	31037	36000	30702	29965		0.932574	0.926291	0.91278	1.09391	1.09459	1.05554	1.00261	0.0876323	0.0919645		1.17788	0.82735
	2.3	24511	24723	31535	32226		27035		0.872017	0.884893	0.933108	0.941143		0.911216	0.908475	0.0298613	0.0370778		0.968198	0.848753
	2.4	23846	23774	29381	29311	28930	28787		0.836938	0.83459	0.845181	0.823146	1.00778	0.997515	0.890858	0.0869381	0.091236		1.06473	0.716982
	2.5	22740	22892	29049	30254	26618	26760		0.778596	0.787838	0.831629	0.861318	0.894514	0.89767	0.841928	0.0515581	0.0541069		0.945044	0.738811
	2.6	22882	23250	25693	26984	24291	24884		0.786087	0.806814	0.694637	0.728951	0.780514	0.805263	0.767044	0.0453439	0.0475855		0.857732	0.676356
	2.7	20433	21708	24947	24453	25355	24969		0.656901	0.725078	0.664185	0.626498	0.832639	0.80945	0.719125	0.0854981	0.0897247		0.890121	0.548129
	2.8	20410	20828	23878	22957	25626	26699		0.655688	0.678432	0.620548	0.565941	0.845916	0.894665	0.710198	0.130595	0.137051		0.971388	0.449008
	2.9	18748	19041	18024	19114	18875	18992		0.568016	0.583709	0.381587	0.410379	0.515182	0.515037	0.495652	0.0824988	0.0865772		0.660649	0.330654
	3	14370	14893	15878	15609	15739	16103		0.337075	0.363838	0.293987	0.268499	0.361548	0.372732	0.332947	0.0425291	0.0446315		0.418005	0.247888
	3.1	13111	13925	15437	15781	14055	14373		0.270662	0.312527	0.275985	0.275461	0.279049	0.287516	0.283534	0.0152605	0.0160149		0.314055	0.253013
	3.2	12085	13970	14115	14698	11038	11550		0.21654	0.314913	0.222021	0.231622	0.131245	0.148462	0.210801	0.0657979	0.0690507		0.342396	0.0792048
	3.3	11012	10884	12351	12392	9701	9901		0.159939	0.151334	0.150014	0.138277	0.065745	0.0672366	0.122091	0.0436193	0.0457756		0.20933	0.0348524
	3.4	9236	8831	11883	11637	9364	9458		0.0662545	0.0425113	0.13091	0.107715	0.0492353	0.0454155	0.0736737	0.0370318	0.0388625		0.147737	-0.000389828
	3.5	9721	9647	10834	11161	8359	8536		0.0918385	0.0857648	0.0880899	0.0884472	0	0	0.0590234	0.0457604	0.0480226		0.150544	-0.0324974
	3.6	8026	8360			8375	8704		0.00242652	0.0175452			0.000783845	0.00827527	0.00725771	0.0075745	0.0120527		0.0224067	-0.0078913
	3.7	7980	8029	9280	9331	8527	8698		0	0	0.0246554	0.0143701	0.00823037	0.00797973	0.00920594	0.00935209	0.00981442		0.0279101	-0.00949825
	3.8	8725	8732	9072	9322	9659	10120		0.0392991	0.0372637	0.0161648	0.0140058	0.0636874	0.078024	0.0414075	0.0254826	0.0267424		0.0923727	-0.00955783
	3.9	8628	9025	11675	10996	8673	8974		0.0341823	0.0527946	0.12242	0.0817681	0.015383	0.0215748	0.0546871	0.0409545	0.0429791		0.136596	-0.0272219
	4	8776	8719	8676	8976	8988	9194		0.0419893	0.0365746	0	0	0.0308149	0.0324115	0.0236317	0.0187089	0.0196338		0.0610496	-0.0137861

## Sheet: 5% 30s
	Raw data								Processing
	[GuSCN]	ThT intensity						plateau avg. intensity	29858.5	29416.7	32558.2	32446.1	32527.7	32949.9
		1 repeat	2 repeat	3 repeat	4 repeat	5 repeat	6 repeat		1 repeat	2 repeat	3 repeat	4 repeat	5 repeat	6 repeat	avg	stdev	confidence		+2sd	-2sd
	0.5	27280	26897	33074	33501	32254	31345		0.879224	0.879829	1.02152	1.0442	0.988042	0.93279	0.957601	0.0711595	0.0746773		1.09992	0.815282
	0.6	28591	28286	33256	32856	29786	29688		0.940631	0.946074	1.02912	1.01717	0.880216	0.863398	0.946102	0.0680497	0.0714138		1.0822	0.810003
	0.7	30021	29396	33671	33112	36951	35952		1.00761	0.999013	1.04644	1.0279	1.19325	1.12572	1.06666	0.0767962	0.0805927		1.22025	0.913063
	0.8	31701	28717	33245	32584	32981	33648		1.0863	0.96663	1.02866	1.00578	1.0198	1.02924	1.02273	0.0388897	0.0408123		1.10051	0.944955
	0.9	32034	32220	31850	32701	32213	33254		1.1019	1.1337	0.970446	1.01068	0.986251	1.01274	1.03595	0.0660937	0.0693611		1.16814	0.903764
	1	29240	29535	30858	31273	31846	31665		0.97103	1.00564	0.92905	0.950853	0.970217	0.946191	0.962164	0.0265082	0.0278187		1.01518	0.909147
	1.1	28419	28748	33554	33373	31723	32606		0.932575	0.968108	1.04156	1.03883	0.964843	0.985598	0.988585	0.0434966	0.0456469		1.07558	0.901592
	1.2	31610	31280	33967	32784	33680	35317		1.08204	1.08887	1.05879	1.01416	1.05034	1.09913	1.06555	0.0311811	0.0327226		1.12792	1.00319
	1.3	29888	28880	30892	31267	31852	32103		1.00138	0.974403	0.930468	0.950601	0.970479	0.964534	0.965311	0.0238389	0.0250174		1.01299	0.917633
	1.4	29801	30208	31215	31010	31991	33921		0.997307	1.03774	0.943947	0.939834	0.976552	1.04067	0.989341	0.0440802	0.0462593		1.0775	0.901181
	1.5	29240	30375	32716	32369	32617	33041		0.97103	1.0457	1.00659	0.99677	1.0039	1.00382	1.00463	0.0240117	0.0251988		1.05266	0.956611
	1.6	29874	29756	31209	32328	31246	31882		1.00073	1.01618	0.943697	0.995052	0.944003	0.955279	0.975823	0.0318918	0.0334684		1.03961	0.912039
	1.7	29263	29528	30326	31277	33579	33917		0.972107	1.00531	0.906849	0.95102	1.04593	1.0405	0.986953	0.0540571	0.0567294		1.09507	0.878838
	1.8	31611	32095	32308	32570	33826	36051		1.08209	1.12773	0.989559	1.00519	1.05672	1.12987	1.06519	0.0596191	0.0625664		1.18443	0.945955
	1.9	30128	30783	35005	31681	28959	29188		1.01262	1.06516	1.10211	0.967946	0.844085	0.842459	0.972397	0.109923	0.115358		1.19224	0.75255
	2	32235	29524	30744	31302	38106	38426		1.11131	1.00512	0.924292	0.952068	1.24371	1.22933	1.07764	0.138757	0.145616		1.35515	0.800125
	2.1	28033	28498	30269	30170	30533	30323		0.914494	0.956185	0.90447	0.904642	0.912852	0.889991	0.913773	0.0225196	0.0236328		0.958812	0.868733
	2.2	27639	27937	28547	28890	28818	29343		0.89604	0.92943	0.83261	0.851017	0.837924	0.84895	0.865995	0.038325	0.0402196		0.942645	0.789345
	2.3	27351	26883	27463	27777	29376	29962		0.88255	0.879162	0.787374	0.804387	0.862303	0.874873	0.848441	0.0416363	0.0436946		0.931714	0.765169
	2.4	24579	24722	26834	27471	27610	27783		0.752711	0.776098	0.761125	0.791567	0.785147	0.783621	0.775045	0.0151147	0.0158619		0.805274	0.744816
	2.5	24954	27303	25783	26326	25391	25894		0.770276	0.899193	0.717266	0.743597	0.6882	0.704513	0.753841	0.0769179	0.0807204		0.907677	0.600005
	2.6	22273	22322	22595	23301	23585	23436		0.644699	0.661637	0.584229	0.616864	0.609296	0.601577	0.619717	0.0285886	0.0300019		0.676894	0.56254
	2.7	19689	19991	22780	21744	21350	21106		0.523666	0.550466	0.591949	0.551634	0.51165	0.504001	0.538894	0.032566	0.0341759		0.604026	0.473762
	2.8	18278	18129	17205	17116	19817	19872		0.457575	0.461662	0.359301	0.357743	0.444674	0.452324	0.422213	0.0496633	0.0521184		0.52154	0.322887
	2.9	17328	17417	18549	18846	18594	18701		0.413078	0.427705	0.415387	0.430221	0.391241	0.403285	0.413486	0.0147306	0.0154588		0.442947	0.384025
	3	15765	16083	18553	18427	16713	15930		0.339867	0.364084	0.415554	0.412667	0.309061	0.287241	0.354746	0.0529247	0.055541		0.460595	0.248896
	3.1	13768	13751	14895	15278	15348	16164		0.246329	0.252865	0.262903	0.28074	0.249424	0.29704	0.264884	0.0200853	0.0210783		0.305054	0.224713
	3.2	12273	12724	13520	13412	13912	14561		0.176304	0.203885	0.205523	0.202563	0.186686	0.22991	0.200812	0.018339	0.0192456		0.23749	0.164134
	3.3	12333	11789	11850	11827	12727	13376		0.179114	0.159293	0.135833	0.136159	0.134914	0.180285	0.154266	0.0217339	0.0228083		0.197734	0.110799
	3.4	10388	10492	10841	11065	11277	12168		0.0880114	0.0974356	0.093727	0.104235	0.0715637	0.129696	0.0974448	0.0192816	0.0202348		0.136008	0.0588817
	3.5	9365	10062	10843	10478	10492	11572		0.0400946	0.0769278	0.0938105	0.0796427	0.0372673	0.104737	0.07208	0.0277646	0.0291372		0.127609	0.0165507
	3.6	9556	9989	9446	9797	9972	10190		0.049041	0.0734463	0.0355128	0.0511121	0.0145487	0.0468615	0.045087	0.0194092	0.0203687		0.0839055	0.0062686
	3.7	8713	9137	9271	9075	10124	9927		0.00955526	0.0328124	0.0282099	0.0208638	0.0211895	0.0358475	0.0247464	0.00957902	0.0100526		0.0439044	0.00558835
	3.8	8509	8449	8854	8746	10168	10885		0	0	0.0108082	0.00708028	0.0231118	0.0759666	0.0194945	0.0289545	0.0303859		0.0774036	-0.0384146
	3.9	8740	8981	9060	8577	10558	10796		0.0108199	0.0253724	0.0194048	0	0.0401508	0.0722395	0.0279979	0.0255527	0.026816		0.0791034	-0.0231076
	4	8586	9065	8595	9578	9639	9071		0.00360664	0.0293785	0	0.0419371	0	0	0.012487	0.0184351	0.0193465		0.0493573	-0.0243832

## Sheet: 5% 0s 
	Raw data								Processing
	[GuSCN]	ThT intensity						plateau avg. intensity	19593.8	19761.8	16633.7	16919.6	18150.6	18212.7
		1 repeat	2 repeat	3 repeat	4 repeat	5 repeat	6 repeat		1 repeat	2 repeat	3 repeat	4 repeat	5 repeat	6 repeat	avg	stdev	confidence		2sd	-2sd
	0.5	18755	19282	16997	17541	18000	18293		0.920506	0.957114	1.04424	1.07274	0.984879	1.00796	0.997906	0.0559863	0.058754		1.10988	0.885934
	0.6	19231	20133	17508	17817	18616	18260		0.965617	1.03318	1.10646	1.10505	1.04673	1.00469	1.04362	0.0555713	0.0583185		1.15476	0.932478
	0.7	20162	20362	16373	16657	18989	19178		1.05385	1.05365	0.968256	0.96926	1.08418	1.0957	1.03748	0.0557597	0.0585162		1.149	0.925963
	0.8	20618	20056	17370	17381	18787	18643		1.09706	1.0263	1.08965	1.05401	1.0639	1.04266	1.06226	0.0272396	0.0285862		1.11674	1.00778
	0.9	19892	20399	17234	17282	17745	18028		1.02826	1.05695	1.07309	1.04242	0.959275	0.981689	1.02362	0.0443451	0.0465373		1.11231	0.934926
	1	21010	20441	16664	16371	17812	18183		1.13421	1.06071	1.00369	0.935781	0.966003	0.997056	1.01624	0.0713	0.0748247		1.15884	0.873642
	1.1	20150	20083	16572	17161	17708	17663		1.05271	1.02871	0.992487	1.02826	0.95556	0.945502	1.00054	0.0433609	0.0455045		1.08726	0.913817
	1.2	19511	19628	16007	16780	17985	18279		0.992153	0.988041	0.923691	0.983658	0.983373	1.00657	0.979582	0.0286805	0.0300983		1.03694	0.922221
	1.3	17618	18280	15786	15977	17426	17955		0.812752	0.867552	0.896782	0.889659	0.927246	0.974452	0.89474	0.0545925	0.0572913		1.00393	0.785555
	1.4	18991	18954	15826	16229	18438	17645		0.942872	0.927796	0.901652	0.919158	1.02886	0.943718	0.944009	0.044441	0.0466379		1.03289	0.855127
	1.5	17791	17719	15541	15592	18093	18053		0.829148	0.817408	0.86695	0.844591	0.994217	0.984167	0.889413	0.0791106	0.0830214		1.04763	0.731192
	1.6	17593	17725	16016	15710	16975			0.810383	0.817945	0.924787	0.858404	0.881963		0.858696	0.0471813	0.0585834		0.953059	0.764334
	1.7	17955	18582	15255	14425	17658	17644		0.84469	0.894546	0.832126	0.707981	0.95054	0.943619	0.86225	0.0899708	0.0944186		1.04219	0.682309
	1.8	17248	17225	15773	15939	17313	17523		0.777687	0.773253	0.895199	0.885211	0.9159	0.931623	0.863145	0.0698144	0.0732658		1.00277	0.723517
	1.9	16648	16453	15029	16649	17173			0.720825	0.704249	0.804607	0.968323	0.901843		0.81997	0.114203	0.141801		1.04838	0.591564
	2	16243	16390	14636	14555	16367	16484		0.682443	0.698618	0.756755	0.723199	0.820917	0.828616	0.751758	0.0619016	0.0649618		0.875561	0.627955
	2.1	14337	15184	14545	14250	15274	15627		0.50181	0.590822	0.745674	0.687496	0.711173	0.743653	0.663438	0.0974179	0.102234		0.858274	0.468602
	2.2	15525	15865	15666	15834	14983	15325		0.614398	0.651692	0.88217	0.872919	0.681955	0.713712	0.736141	0.11439	0.120045		0.964921	0.507361
	2.3	14121	14170	13410	13670	14454	14547		0.48134	0.500188	0.607474	0.619601	0.628841	0.636581	0.579004	0.0692932	0.0727187		0.71759	0.440418
	2.4	13754	13874	11876	12236	13719	13571		0.446559	0.47373	0.42069	0.451736	0.555042	0.53982	0.481263	0.0541744	0.0568526		0.589612	0.372914
	2.5	12602	12150	11620	11689	13606	13581		0.337383	0.319634	0.389519	0.387704	0.543697	0.540811	0.419791	0.0987592	0.103641		0.61731	0.222273
	2.6	13351	13451	11411	10829	13048	13643		0.408366	0.435921	0.36407	0.287032	0.48767	0.546958	0.42167	0.0915186	0.0960429		0.604707	0.238632
	2.7	11031	10484	10647	10933	11973	12285		0.188499	0.170722	0.271044	0.299206	0.379734	0.412325	0.286922	0.0979109	0.102751		0.482743	0.0910998
	2.8	11696	12634	10857	10626	11423	11542		0.251521	0.362895	0.296614	0.263269	0.324511	0.338664	0.306246	0.0436539	0.0458119		0.393553	0.218938
	2.9	10549	10253	9822	9447	10885	10719		0.142819	0.150074	0.170589	0.125255	0.270493	0.257071	0.18605	0.0620852	0.0651544		0.310221	0.0618798
	3	10340	10488	9513	9509	9974	10063		0.123012	0.171079	0.132965	0.132512	0.179023	0.192035	0.155104	0.0290574	0.0304938		0.213219	0.0969897
	3.1	9042	9358	9123	8937	9183	9297		0	0.0700763	0.0854774	0.0655538	0.0996024	0.116093	0.0728006	0.0402819	0.0422733		0.153364	-0.00776332
	3.2	9393	9269	9209	8715	8580	8683		0.0332645	0.0621212	0.095949	0.0395664	0.0390578	0.0552212	0.0541967	0.0231883	0.0243346		0.100573	0.00782006
	3.3	9306	9022	8681	9042	8859	8784		0.0250194	0.0400436	0.0316583	0.0778452	0.067071	0.0652344	0.0511453	0.0216821	0.022754		0.0945095	0.00778114
	3.4	9089	9138	9021	8916	8320	8364		0.00445422	0.0504121	0.0730576	0.0630955	0.0129523	0.0235954	0.0379279	0.0281888	0.0295823		0.0943055	-0.0184498
	3.5	9292	8998	8421	8377	8219	8126		0.0236926	0.0378984	0	0	0.00281136	0	0.0107337	0.0162127	0.0170142		0.0431591	-0.0216916
	3.6	9379	8574	8521	8593	8326	8217		0.0319377	0	0.0121763	0.025285	0.0135548	0.00902178	0.0153293	0.0115136	0.0120828		0.0383565	-0.007698
	3.7	9447	8788	8994	8731	8191			0.0383821	0.019128	0.06977	0.0414394	0		0.0337439	0.026129	0.0324434		0.0860018	-0.018514
	3.8	9177	8816	8620	8816	8373			0.012794	0.0216307	0.0242308	0.0513895	0.0182738		0.0256638	0.0150031	0.0186288		0.05567	-0.00434247
	3.9	9102	8863	9083	8987	8573	8658		0.00568623	0.0258317	0.0806069	0.0714068	0.038355	0.0527427	0.0457716	0.0282089	0.0296034		0.102189	-0.0106462
	4	9522	9460	8836	8976				0.0454899	0.0791934	0.0505315	0.0701192			0.0613335	0.0159569	0.025391		0.0932473	0.0294197
